# Supplementary material for: New S/O-substituted ferrocenediyl ligands and their metal complexes
Source: Royal Society of Chemistry journal article supplement (doi:10.1039/b602576e), 2006-01-01
Supplement: b602576e.pdf [file b602576e.pdf]

## Supporting Information — X-Ray Crystallography

**Manuscript:** New S/O-substituted ferrocenediyl ligands and their metal complexes

**Authors:** Robert C.J. Atkinson, Vernon C. Gibson, Nicholas J. Long,  
Lara J. West and Andrew J.P. White

**Fig. S1** The molecular structure of the centrosymmetric complex **11** (70% probability ellipsoids).

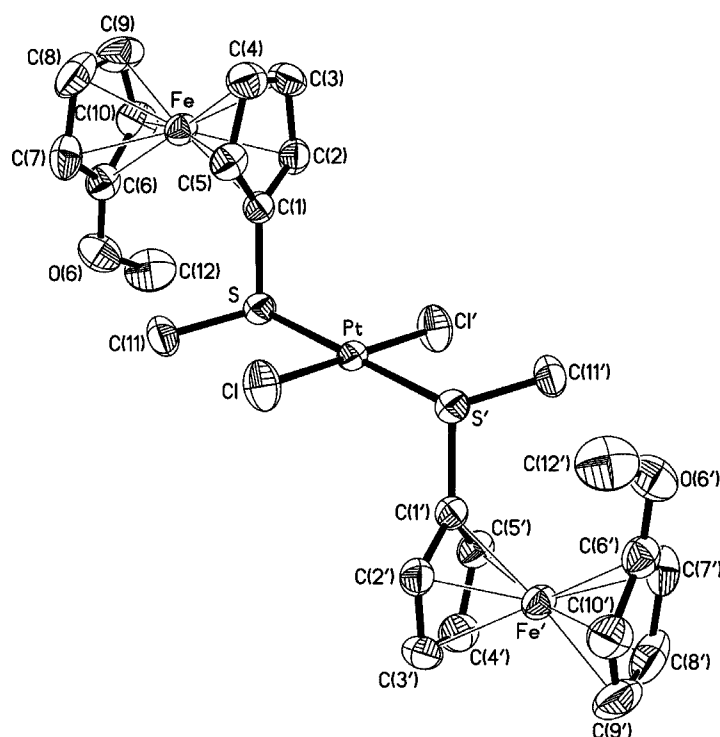

Fig. S1
